# Supplementary material for: Can Callous-Unemotional Traits be Reliably Measured in Preschoolers?
Source: Springer Nature journal article supplement (doi:10.1007/s10802-015-0075-y), 2015-09-06
Supplement: MOESM1 [file 798028]

Table 5. *Pearson correlations (standardized betas) between Hawes et al. (2014) two factor model parent reported CU scores and main study variables.*

|  | ICU total (12-item) | ICU Uncaring | ICU Callousness |
| --- | --- | --- | --- |
| UNSW CU Scale | .59*** | .67*** (.64***) | .33***  (.19*) |
| GEM Cognitive | -.33*** | -.31***  (-.23**) | -.26**  (-.15*) |
| GEM Affective | -.20* | -.26**  (-.24**) | -.10  (.01) |
| GEM Total | -.38*** | -.40***  (-.33***) | -.27***  (-.13) |
| SDQ Prosocial Behavior | -.50*** | -.52***  (-.46***) | -.34***  (-.22**) |
| PSBS Prosocial Behavior | -.22** | -.33***  (-.32) | -.07  (.04) |
| SDQ Anxiety | .15 | .05  (.00) | .16*  (.15*) |
| APSD Narcissism | .33*** | .17*  (.07) | .34***  (.30***) |
| APSD Impulsivity/CP | .47*** | .33***  (.23**) | .43***  (.36***) |
| ECBI/SESBI T-Score | .44*** | .33***  (.24**) | .39***  (.32***) |
| PSBS Aggression |  |  |  |
| -Relational | .02 | -.01  (-.03) | .04  (.05) |
| -Overt | .17* | .24**  (.24**) | .07  (-.01) |

*Note.* a*p* = .05;**p* < .05; ***p* < .01; ****p* < .001. Standardized betas are from regression analyses with both ICU subscales entered into the model together. UNSW CU scores are parent-reported. GEM = Griffith Empathy Measure (Parent report); SDQ = Strengths and Difficulties Questionnaire (Parent report); PSBS = Preschool Social Behavior Scale (Teacher report); APSD = Antisocial Process Screening Device – Resolved; CP = Conduct problems; ECBI/SESBI = Eyberg Child Behavior Inventory/ Sutter-Eyberg Student Behavior Inventory CP Intensity – Resolved score.
